# Supplementary material
Source: PubMed Central journal article supplement (PMC7855939)
Supplement: NIHMS1645816-supplement-317345_Major_Resources_Table.pdf [file NIHMS1645816-supplement-317345_Major_Resources_Table.pdf]

## Major Resources Table

This document provides readme documentation for the source code used to generate the results for the manuscript. There is also a demo code to show the results of the trained model for a sample dataset.

### Data & Code Availability

- **Code:** The main code is presented in a Jupyter notebook format (.ipynb). The code provides information for all the steps and the functions that are used in the result. Comments are provided for each function.
  - The main code is saved in "Code\_for\_manuscript\_submission.ipynb" as jupyter notebook in the Code folder. The rest of the functions are helper functions saved as a .py file. The full source code will only run with full dataset (we only provide demo dataset).
- **Data:** Only a subset of the data is provided for demo purposes and can be found in the Demo folder.

**URL:** [https://github.com/NarayanLab/VT\\_MAP\\_Project](https://github.com/NarayanLab/VT_MAP_Project)

| Description                                                                                                                                          | Source / Repository                                     |
|------------------------------------------------------------------------------------------------------------------------------------------------------|---------------------------------------------------------|
| Excel sheet showing the actual labels for both VTVF and Mortality endpoints and whether they were in training/validation splits in the trained model | 20191219.xlsx                                           |
| Helper function to calculate accuracy, sensitivity, specificity, NPV, PPV                                                                            | Calc_metrics_v2                                         |
| Jupyter notebook to run demo. Running this demo will show results from the sample dataset provided.                                                  | Demo_Code.ipynb                                         |
| Trained model using cross validation 1 for mortality endpoint                                                                                        | Mortality_CV1_finalized_model.sav                       |
| Trained model using cross validation 1 for VTVF endpoint                                                                                             | VTVF_CV1_finalized_model.sav                            |
| Input and true output for model (Mortality). First 5-digit contain patient ID, and last 4 digits contain beat ID.                                    | Mortality_labels_demo & Mortality_tsfresh_features_demo |
| Input and true output for model (VTVF).                                                                                                              | VTVF_labels_demo & VTVF_tsfresh_features_demo           |
| Numpy (.npz) file that has the voltage-timeseries MAPs. Each point is 1msec apart and the values are voltages in mV.                                 | demo_data_20191219.npz                                  |

### 1. Hardware and Software

This program runs on a desktop computer system with following specifications:

- Inter Core i9-9900K CPU @3.6Ghz, 3600 Mhz, \* cores, 16 Logical Processors
- Microsoft Windows 10 Pro
- 32 GB RAM

All computations were performed on Python 3.6 using Anaconda Navigator 1.9.7. The following packages were used:

- numpy 1.17.3
- pandas 0.23.4
- pandas-datareader 0.8.0
- scikit-learn 0.21.3
- scipy 1.3.1
- tsfresh 0.12.0
- xlrd 1.2.0
- xlsxwriter 1.2.6
- jupyter 1.0.0
- pickle 1.0 or higher
- matplotlib 3.3.0

### 2. Software License

Creative Commons Attribution-NonCommercial-NoDerivatives

DOI [to be added]
