# Supplementary material
Source: PubMed Central journal article supplement (PMC7855939)
Supplement: NIHMS1645816-supplement-317345_Online.pdf [file NIHMS1645816-supplement-317345_Online.pdf]

# 1 SUPPLEMENTAL MATERIAL

2

## 3 Detailed Methods and Results

### 4 Feature selection for supervised learning

5 An overview of MAP recording feature selection process is shown in Online Figure III.

6 After cropping of the raw signals, each MAP recording was analyzed using the Python *tsfresh*  
7 library (Reference 20) Using this package, we calculated the complete library output available  
8 for signals of this size. This resulted in  $N = 794$  scalar variables representing the mathematical  
9 features provided by the *tsfresh* library. This has been shown to effectively filter noise in time  
10 series signals and improve computational efficiency . We then used the Benjamini-Yekutieli  
11 approach (Reference 21), which can be applied to multiple tests to minimize the false discovery  
12 rate, assuming arbitrary dependence of p-values to select features most strongly linked with  
13 the outcomes ( $N = 622$  [VT/VF] and  $N = 549$  [Mortality]). Next, we dropped features that  
14 correlated highly to others to reduce redundancy left  $N=274$  and  $N=259$  features for each  
15 endpoint, respectively. Finally, the  $N = 40$  features with highest coefficients for each endpoint  
16 were selected using logistic regression with L1 regularization and provided optimal  
17 performance of SVM in training.

18

### 19 Feature quantity analysis for supervised learning:

20 We performed an optimization analysis to determine the number of features used to  
21 generate the beat-level model. The top  $N$  features from the output of the *tsfresh* and logistic  
22 regression steps (Online Figure III) were used in iteratively training the SVM beat-level model.  $N$

23 was ranged widely between 5 and 100 features with the resulting validation accuracy  
24 optimization curve. The optimal number of features was 40.

25

### 26 **Supervised learning implementation using Support Vector Machine classifier:**

27 For beat-level predictions, we compared several ML approaches including support  
28 vector machines (SVM), convolutional neural networks, and other supervised architectures.  
29 Extensive testing revealed that SVM classifier provided superior test characteristics to CNN  
30 (Online Table I and II).

31 The inputs (support vectors) were the scalar parameters from the output of the *tsfresh*  
32 output features described above. The SVM algorithm identifies a subset of inputs, termed  
33 support vectors, that form a decision boundary which optimally should separate output classes  
34 (endpoints). Training aims to increase the distance between input data and boundaries to  
35 improve the generalizability of the model. The supervised learning model was developed in  
36 Python 3.6. The Support Vector Machine classifier was implemented using sklearn library  
37 (scikit-learn 0.21.3). We used an SVM classifier (using “from sklearn.svm import SVC”) with a  
38 linear kernel. To avoid overfitting in the SVM classifier, we trained the SVM classifier in 10-fold  
39 cross-validation using a regularization parameter of  $C = 1$ .

40

### 41 **Supervised learning implementation using a convolutional neural network classifier:**

42 The Convolutional Neural Network was implemented using tensorflow 2.1.0 and Keras 2.2.4-tf  
43 framework and written in Python 3.6. The raw voltage-time series data points from each MAP  
44 beat were directly used as inputs to the CNN (in contrast to feature outputs from the *tsfresh*

45 and logistic regression process). Training and testing were performed using the same K-fold  
46 cross validation splits discussed in the methods section for both analyses. The CNN architecture  
47 was implemented according to the architecture below, illustrated in Online Figure IV.

48

#### 49 **MAP score calculation and receiver operator characteristics analysis.**

50 We developed the MAP score to generate a continuous patient-level index of risk for  
51 clinical outcomes from the output of the beat-level model. This allows all beats collected in a  
52 patient to be unified into a single risk prediction index despite biological or technical variability  
53 between beats. The MAP score is defined as the proportion of test set beats recorded from  
54 each patient that predict the endpoint of interest by the beat-level model. The proportion is  
55 calculated as:

$$56 \text{ MAP score} = \left( \frac{\text{\# of beats predicting the endpoint}}{\text{total \# of beats}} \right)$$

57 for each endpoint in turn. For example, a patient in whom 80% of beat-level MAP recordings  
58 predicted VT/VF would be assigned a MAP score of 80%.

59 The ROC curve analysis was conducted in IBM SPSS v.19 by varying the cut-point of the  
60 MAP score from 0% to 100%. The output includes the data points used to draw the  
61 curves. These were imported into Jandel SigmaPlot version 11.0 which was used for graphing  
62 with better appearance.

63

#### 64 **Phase 1 repolarization analysis**

65 We quantified phase 1 as the mean voltage of each MAP from the upstroke to dome of  
66 phase II, between 10 ms to 40 ms after phase 0. For MAP beats that predicted mortality, the

67 mean Phase 1 standardized voltage was lower than in those predicting survival ( $2.44 \pm 1.31$  vs.  
68  $3.32 \pm 2.47$ ,  $p < 0.001$ ). This phase 1 metric predicted mortality with a c-statistic of 0.816 (CI:  
69 0.676 to 0.957).

70

### 71 **Biophysical simulation of MAPs classified by machine learning to predict each endpoint**

72 We simulated cardiac cellular electrophysiology (membrane action potentials) using the  
73 O’Hara Rudy model, which has been validated in human ventricles and recommended by the  
74 FDA for drug testing for sudden cardiac death as part of the CiPa initiative (Reference 23).  
75 Cellular transmembrane action potentials were simulated following 160-beat stimulus train at  
76 109 beats/min (550ms cycle length) to reach steady state. Two additional stimuli were applied  
77 at the same cycle length (550ms) and the action potential durations (APDs) of these  
78 extrastimuli were measured. APD measurements ( $APD_{XX}$ ) were made in standard fashion by  
79 computing difference in time from the pacing stimulus (maximum time derivative of the  
80 tracing) and the time where the amplitude of the normalized tracing falls below  $100\% - XX\%$   
81 (where  $XX = 30$  for  $APD_{30}$ ,  $60$  for  $APD_{60}$ , and  $90$  for  $APD_{90}$ ). All waveforms were voltage-  
82 normalized across the dataset. If the difference between the  $APD_{90}$  of the first and second  
83 extrastimuli was greater than 50 ms, the case was marked as “APD alternans” and excluded  
84 from our analysis of steady-state action potential shapes.

85 The O’Hara model represents 14 transmembrane and 2 intracellular ion channels,  
86 pumps, and exchangers, referred to as ionic pathways, which we used to study action potential  
87 shapes. We focused on the hERG channel (IKr), L-Type  $Ca^{2+}$  Channel (ICaL),  $Na^{+}$ - $Ca^{2+}$   
88 exchanger (NCX), Transient Outward current (Ito) and the sarcoplasmic reticulum ATPase

89 (SERCA), which have been reported to be the most important ionic pathways altered in heart  
 90 failure (Reference 24). To identify the ionic pathways that may explain clinically measured MAP  
 91 morphologies, we performed an extensive grid search. While computationally expensive, this  
 92 method provides a global analysis with known accuracy. Of note, MAP measurements are  
 93 recorded from patients with extensive cardiac disease and may not be well represented by the  
 94 reference published ion pathway densities.

95 We consider that the densities of Ito, ICaL, IKr, NCX and SERCA could be altered under  
 96 pathological conditions over a range of -80% to +100% for each ionic pathway, consistent with  
 97 previous reported ranges used to model heart failure in humans (Reference 24). Parameter  
 98 ranges for each channel are reported below (Online Methods Table 1). We separated each  
 99 parameter range into 21 evenly spaced intervals and evaluate every parameter value  
 100 permutation for all 5 ionic pathways. This results in  $21^5$  or 4,084,101 cell model parameter sets.

101

|                  | <u>Ito (Gto)</u> | <u>Ikr (GKr)</u> | <u>ICaL (pCa)</u> | <u>NCX (Gncx)</u> | <u>SERCA (JupMAX)</u> |
|------------------|------------------|------------------|-------------------|-------------------|-----------------------|
| Min              | 0.004            | 0.0092           | $0.2e^{-4}$       | 0.00016           | 0.000875              |
| Max              | 0.04             | 0.092            | $2e^{-4}$         | 0.0016            | 0.00875               |
| Number of values | 21               | 21               | 21                | 21                | 21                    |

102  
 103 **Online Methods Table 1. Ionic pathway, labelled by channel, exchanger and pump name and**  
 104 **corresponding cell model parameter in brackets, ranges consider spanning -80% to +100% of**  
 105 **reference values.**  
 106

107 Simulations were performed for both mortality and VT/VF endpoints. For each, MAP  
 108 traces representing the average trace for the event and non-event groups were used to explain  
 109 the model parameter outputs. The best fit was determined based on smallest discrepancy

110 between APD30, 60, and 90 between event and non-event groups and between the spectrum  
 111 of the measured and simulated tracings as described below.

112

113 **MAP fitting by APD<sub>xx</sub> and signal spectrum:**

114 1. We define the set  $S_1$  of the candidates satisfying the following conditions for **all** the  
 115 APD<sub>xx</sub>:

$$\frac{|APD_{XX}^{computed} - \mathbb{E}(APD_{XX}^{measured})|}{\mathbb{S}(APD_{XX}^{measured})} < C_{XX}$$

116 Here  $\mathbb{E}(APD_{XX}^{measured})$  is the APD<sub>xx</sub> of the measured mean trace,  $\mathbb{S}(APD_{XX}^{measured})$  is  
 117 the estimated APD<sub>xx</sub> standard deviation and  $C_{XX}$  is a coefficient that prescribes a  
 118 tolerance for APD<sub>xx</sub>. We chose  $C_{XX} = 1$  for all the APD<sub>xx</sub>. This results in all simulated  
 119 APDs from plausible parameter sets falling within one standard deviation of all  
 120 measured APD.

121 2. In the second step, we associate each candidate  $s_1^j \in S_1$  with the cost  $\mathcal{C}(s_1^j)$  evaluated  
 122 using the modal coefficients of the semi-classical signal analysis ( $\mathcal{S}(s_1^j)$ ; see [Signal](#)  
 123 [Spectral Fit](#) below) and the fit of the simulated to measured APD values. We build the  
 124 set  $S_2 \subset S_1$  of the candidates that satisfy:

$$\mathcal{C}(s_1^j) = \mathcal{S}(s_1^j) + \sum_{XX} \frac{|APD_{XX}^{computed} - \mathbb{E}(APD_{XX}^{measured})|}{\mathbb{S}(APD_{XX}^{measured})}$$

125 We adopt a 1% cut-off on  $\mathcal{C}(s_1^j)$ , for course resolution (21 values) data sets and a 0.5%  
 126 cut-off for fine resolution (91 values) data sets, to identify a final list  $S_2$  of retained

127 candidate parameter sets. The set  $S_2$  represents the model parameters that produce the  
128  $V_m$  trace closest to the measured MAP trace within the prescribed tolerances.

129

130 **Signal spectral fit:**

131 In step 2 of determining the plausible parameters, we aim to identify parameters that  
132 generate an action potential morphology that best matches the clinically measured MAP  
133 morphology. We use semi-classical signal analysis (SCSA) to perform the comparison (Reference  
134 25). SCSA is the non-linear counterpart of the Fourier transform. We chose SCSA as it requires a  
135 limited number of modes (the negative spectrum) resulting in increased efficiency.

136 1. We evaluate the cost  $\mathcal{S}(s_1^j)$  with the following procedure. First, we rescale the time axis  
137 within the interval  $[0,1]$  and then normalize each trace  $u(t)$  (MAP and computed  $V_m$ ) as  
138 follows:

$$\hat{u}(t) = \frac{u(t) - \min(u(t \geq 35 \text{ ms}))}{\max(u(t \geq 35 \text{ ms})) - \min(u(t \geq 35 \text{ ms}))}$$

139 Here we consider  $t \geq 35 \text{ ms}$  in the rescaling to remove artefact due to the pacing  
140 stimulus and rescale the signal to be greater than 0.

141 2. Next, we evaluate the Eigen-functions of the Schrödinger problem:

$$\frac{d^2}{dt^2}(\varphi) + \chi \hat{u}(t)\varphi = \lambda\varphi$$

142 We have discretized the problem using a pseudo-spectral method. Here the parameter  
143  $\chi$  plays the role of a parameter that increases the accuracy of  $\hat{u}(t)$  by reducing the  
144 smoothness of the function. As  $\chi$  gets larger, the representation is more accurate, since

145 the number of negative eigenvalues increases. We chose  $\chi = 8000$ , which adequately  
146 bounded the differences in MAP waveforms.

147 3. Finally, we evaluated:

$$S(s_2^j) = \sum_{j=1}^N \frac{|\sqrt{-\lambda_j^C} - \sqrt{-\lambda_j^M}|}{\sqrt{-\lambda_j^M}}$$

148 Here  $\lambda_j^{C,M}$  is the  $j$ th negative eigenvalue obtained from the SCSA on the computed and  
149 measured traces respectively;  $N$  is the minimum between the number of negative  
150 eigenvalues in the SCSA on the computed and clinically measured traces respectively.

151 This provides a measure of the similarity in the shape of the two traces.

152

### 153 **Global sensitivity analysis:**

154 A Saltelli global sensitivity analysis (GSA) (Reference 26) of the APD values to the ionic  
155 pathway densities was performed using the data base of generated simulations, to identify  
156 variables with the greatest influence on APD. The implementation was verified against the  
157 Ishigami analytic solutions (Reference 27). GSA was not performed on SCSA due to the  
158 computational cost. We found that APD values were predominantly defined by IKr, with the  
159 least contribution from SERCA (Figure 5A of main manuscript).

160 We now considered a reduced analysis. We considered Ito due to its prominent role in  
161 phase 1, where measured MAP morphology differed between patients who died versus those  
162 who survived (Figure 4B from main manuscript). IKr was maintained due to its important in  
163 determining APD (Figure 5A from main manuscript). We cannot differentiate between NCX and



164 I<sub>CaL</sub> as they have similar importance (Figure 5A from main manuscript) and both cause a  
 165 depolarizing current prolonging the action potential. As both NCX and I<sub>CaL</sub> are equally plausible  
 166 explanations for the data we considered 2 sets of ionic pathways. Dataset 1: I<sub>to</sub>, I<sub>Kr</sub> and I<sub>CaL</sub> or  
 167 Dataset 2: I<sub>to</sub>, I<sub>Kr</sub> and NCX. We repeated the analysis, described above, to identify the plausible  
 168 parameter sets for these two new sets of ionic pathways. Parameter ranges for Dataset 1 and 2  
 169 are defined below.

170

171 **DATASET 1: I<sub>CaL</sub> (753,571 samples)**

|                         | <b>I<sub>to</sub> (G<sub>to</sub>)</b> | <b>I<sub>Kr</sub> (G<sub>Kr</sub>)</b> | <b>I<sub>CaL</sub> (pCa)</b> |
|-------------------------|----------------------------------------|----------------------------------------|------------------------------|
| <b>Min</b>              | 0.004                                  | 0.0092                                 | $0.2e^{-4}$                  |
| <b>Max</b>              | 0.04                                   | 0.092                                  | $2e^{-4}$                    |
| <b>Number of values</b> | 91                                     | 91                                     | 91                           |

172

173

174 **DATASET 2: NCX (753,571 samples)**

|                         | <b>I<sub>to</sub> (G<sub>to</sub>)</b> | <b>I<sub>Kr</sub> (G<sub>Kr</sub>)</b> | <b>NCX (G<sub>ncx</sub>)</b> |
|-------------------------|----------------------------------------|----------------------------------------|------------------------------|
| <b>Min</b>              | 0.004                                  | 0.0092                                 | $0.16e^{-3}$                 |
| <b>Max</b>              | 0.04                                   | 0.092                                  | $1.6e^{-3}$                  |
| <b>Number of values</b> | 91                                     | 91                                     | 91                           |

175

176

177 **Analysis of APD alternans**

178 For each dataset (altered P<sub>Ca</sub> or altered NCX) and for VT/VF or non-VT/VF phenotypes,  
 179 we performed single cell simulations by pacing each OD model at a fixed pacing cycle length for  
 180 320 stimuli, followed by 2 additional stimuli in which we evaluated APD<sub>60</sub>. This procedure was  
 181 conducted for pacing cycle length starting at 250 ms and shortened (accelerated) progressively  
 182 to 200 in increments of 5ms.

183 Alternans was assigned whenever APD60 in those 2 beats differed by  $> 50$  ms. For each  
184 cell model, we quantified alternans as the percentage of pacing trials that exhibited alternans at  
185 slow rates (paced cycle lengths  $\geq 220$  ms) or at fast rates ( $< 220$  ms). The presence of APD  
186 alternans at slower rates indicates that it arises from a lesser perturbation, which may indicate  
187 a greater vulnerability to arrhythmia (Reference 44).

188 We found that cell models with higher  $I_{CaL}$  more often presented APD alternans at slow  
189 rates (cycle lengths 220-235 ms) than models with lower  $I_{CaL}$ , with similar prevalence at faster  
190 rates (cycle lengths 200-215 ms). Conversely, the prevalence of APD alternans was similar  
191 between cell models with enhanced versus non-enhanced NCX for slower or faster rates.

192

193 **Online Tables:**  
 194  
 195 **Online Table I**  
 196

| Layer                          | Parameters                                          |
|--------------------------------|-----------------------------------------------------|
| Conv1D                         | filters = 32, kernel_size = 16, strides = 1         |
| BatchNormalization             | None                                                |
| Activation                     | activation = 'relu'                                 |
| Dropout                        | 0.3                                                 |
| MaxPooling1D                   | pool_size=2, strides = 1                            |
| Conv1D                         | filters = 64, kernel_size = 16, strides = 1         |
| BatchNormalization             | None                                                |
| Activation                     | activation = 'relu'                                 |
| Dropout                        | 0.3                                                 |
| MaxPooling1D                   | pool_size=2, strides = 1                            |
| Bidirectional<br>(layers.LSTM) | units = 128, dropout = 0.2, recurrent_dropout = 0.3 |
| Dense                          | units = 1, activation = 'sigmoid'                   |

197  
 198 **Online Table I Convolutional Neural Network architecture** with parameters and descriptions of  
 199 each layer.  
 200

201  
 202 **Online Table II – Test characteristics at the beat-level, for all MAPs across all 10 k-cross**  
 203 **validation sets results from CNN model and SVM model.**  
 204

|            | Mortality |             |             |       |       |
|------------|-----------|-------------|-------------|-------|-------|
|            | Accuracy  | Sensitivity | Specificity | NPV   | PPV   |
| <b>SVM</b> | 75.4%     | 60.0%       | 81.6%       | 83.4% | 57.0% |
| <b>CNN</b> | 70.6%     | 11.7%       | 94.6%       | 72.5% | 46.8% |

|            | VT/VF    |             |             |       |       |
|------------|----------|-------------|-------------|-------|-------|
|            | Accuracy | Sensitivity | Specificity | NPV   | PPV   |
| <b>SVM</b> | 83.2%    | 72.6%       | 89.0%       | 85.6% | 78.2% |
| <b>CNN</b> | 56.7%    | 40.3%       | 65.6%       | 66.9% | 39.0% |

205

206 **Online Table III - Baseline Characteristics of Population Split by all-cause mortality at 3-years**

|                                | All Subjects<br>(n=42) | Death<br>(n=14)   | No Death<br>(n=28) | p     |
|--------------------------------|------------------------|-------------------|--------------------|-------|
| Age, y                         | 64.7 ± 13.0            | 71.5 ± 8.5        | 61.3 ± 13.6        | 0.014 |
| Gender, M/F                    | 41/1                   | 14/0              | 27/1               | 1     |
| LVEF, %                        | 27.0 ± 7.6             | 27.5 ± 7.4        | 26.70 ± 7.8        | 0.766 |
| QRS Duration, ms               | 126 ± 33               | 121 ± 19.9        | 129 ± 38           | 0.495 |
| LBBB, % (n)                    | 28.6 (12)              | 23.1 (3)          | 31.0 (9)           | 0.716 |
| RBBB, % (n)                    | 14.3 (6)               | 14.3 (2)          | 14.3 (4)           | 1     |
| IVCD, % (n)                    | 21.4 (9)               | 30.8 (4)          | 17.2 (5)           | 0.437 |
| Any IVCD, % (n)                | 64.3 (27)              | 62.1 (18)         | 69.2 (9)           | 1     |
| Myocardial Infarct, % (n)      | 88.1 (37)              | 100 (14)          | 82.1 (23)          | 0.151 |
| Days from MI to EPS (IQR)      | 3036 (1319-7015)       | 2248 (1270-3036)  | 6550 (1260-7555)   | 0.154 |
| Days from revasc. to EPS (IQR) | 2495 (1260-4714)       | 2248 (1449-3873)  | 2529 (903-6372)    | 0.658 |
| CAD Vessels, % (n)             |                        |                   |                    |       |
| LAD                            | 59.5 (25)              | 69.2 (9)          | 55.2 (16)          | 0.73  |
| LCx                            | 54.8 (23)              | 61.5 (8)          | 51.7 (15)          | 1     |
| RCA                            | 61.9 (26)              | 61.5 (8)          | 62.1 (18)          | 1     |
| Hypertension, % (n)            | 19.0 (8)               | 7.1 (1)           | 0.25 (7)           | 0.233 |
| Diabetes Mellitus, % (n)       | 14.3 (6)               | 7.1 (1)           | 17.9 (5)           | 0.645 |
| Laboratory values              |                        |                   |                    |       |
| BNP, pg/ml (median, IQR)       | 341 (157-999)          | 900 (326.25-1325) | 277 (109-502)      | 0.014 |
| Sodium, mmol/L                 | 139 ± 3.6              | 138 ± 4.2         | 139 ± 3.3          | 0.915 |
| Potassium, mmol/L              | 4.3 ± 0.4              | 4.2 ± 0.4         | 4.4 ± 0.4          | 0.109 |
| Magnesium, mmol/L              | 2.0 ± 0.4              | 2.2 ± 0.2         | 2.0 ± 0.4          | 0.134 |
| Prior Medications, % (n)       |                        |                   |                    |       |
| Beta-Blocker                   | 78.6 (31)              | 72.9 (6)          | 89.3 (25)          | 0.002 |
| ACE inhibitors/ARB             | 92.9 (39)              | 85.7 (12)         | 96.4 (27)          | 0.254 |
| Spirolactone                   | 19.0 (8)               | 14.3 (2)          | 21.4 (6)           | 697   |
| CCB                            | 14.3 (6)               | 21.4 (3)          | 10.7 (3)           | 0.383 |
| Digoxin                        | 38.1 (16)              | 31.4 (3)          | 46.4 (13)          | 0.18  |
| Amiodarone                     | 9.5 (4)                | 14.3 (2)          | 7.1 (2)            | 0.59  |
| Statins                        | 71.4 (30)              | 78.6 (11)         | 67.9 (19)          | 0.719 |
| Implantable Device at EPS*     | 85.7 (36)              | 92.3 (12)         | 82.8 (24)          | 1     |

\*within 14 days

207 **Key:** All patients had electrophysiology study based on the presence of ischemic cardiomyopathy, left  
 208 ventricular ejection fraction ≤40% and non-sustained VT/VF (ref 18 in main manuscript). Values are n,  
 209 mean ± standard deviation, or median (interquartile range). Categorical variables are compared using  
 210 Fisher’s exact test; continuous variables using the t-test (except BNP: Mann-Whitney U test performed  
 211 because data is not normally distributed). ACE, angiotensin converting enzyme; ARB, angiotensin  
 212 receptor blockers; BNP, B-type natriuretic peptide concentration; CCB, calcium channel blockers; CAD,  
 213 coronary artery disease; EPS, electrophysiology study; IVCD, intraventricular conduction delay; LAD, left  
 214 anterior descending artery; LBBB, left bundle branch block; LCx, left circumflex artery; MI, myocardial  
 215 infarction; RBBB, right bundle branch block; RCA, right coronary artery, Revasc., coronary  
 216 revascularization; Statins, HMG-CoA reductase inhibitors.

217 Online Table IV - Baseline Characteristics of Population Split by Inducibility of VT or VF in EPS

|                                | All Subjects<br>(n=42) | Induced VT/VF<br>(n=14) | VT/VF Not Induced<br>(n=28) | p     |
|--------------------------------|------------------------|-------------------------|-----------------------------|-------|
| Age, y                         | 64.7 ± 13.0            | 67.2 ± 13.1             | 63.4 ± 12.9                 | 0.379 |
| Gender, M/F                    | 41/1                   | 14/0                    | 27/1                        | 1     |
| LVEF, %                        | 27.0 ± 7.6             | 27.4 ± 10.0             | 26.8 ± 6.2                  | 0.831 |
| QRS Duration, ms               | 126 ± 33               | 123 ± 29                | 127 ± 36                    | 0.761 |
| LBBB, % (n)                    | 28.6 (12)              | 28.6 (4)                | 28.6 (8)                    | 1     |
| RBBB, % (n)                    | 14.3 (6)               | 14.3 (2)                | 14.3 (4)                    | 1     |
| IVCD, % (n)                    | 21.4 (9)               | 28.6 (4)                | 17.9 (5)                    | 0.437 |
| Any IVCD, % (n)                | 64.3 (27)              | 71.4 (10)               | 60.7 (17)                   | 0.484 |
| Myocardial Infarct, % (n)      | 88.1 (37)              | 92.9 (13)               | 85.7 (24)                   | 0.65  |
| Days from MI to EPS (IQR)      | 3036 (1319-7015)       | 2666 (1535-6395)        | 2450 (1591-3598)            | 0.612 |
| Days from revasc. to EPS (IQR) | 2495 (1260-4714)       | 2450 (1591-3597)        | 3160 (775-5071)             | 0.763 |
| CAD Vessels, % (n)             |                        |                         |                             |       |
| LAD                            | 59.5 (25)              | 64.3 (9)                | 57.1 (16)                   | 0.73  |
| LCx                            | 54.8 (23)              | 57.1 (8)                | 53.6 (15)                   | 1     |
| RCA                            | 61.9 (26)              | 71.4 (10)               | 57.1 (16)                   | 0.316 |
| Hypertension, % (n)            | 19.0 (8)               | 0 (0)                   | 28.6 (8)                    | 0.037 |
| Diabetes Mellitus, % (n)       | 14.3 (6)               | 0 (0)                   | 21.4 (6)                    | 0.083 |
| Laboratory values              |                        |                         |                             |       |
| BNP, pg/ml (median, IQR)       | 341 (157-999)          | 490.5 (288-1433)        | 270 (221-721)               | 0.104 |
| Sodium, mmol/L                 | 139 ± 3.6              | 138 ± 4.1               | 139 ± 3.3                   | 0.915 |
| Potassium, mmol/L              | 4.3 ± 0.4              | 4.4 ± 0.5               | 4.4 ± 0.4                   | 0.949 |
| Magnesium, mmol/L              | 2.0 ± 0.4              | 2.1 ± 0.2               | 2.0 ± 0.4                   | 0.34  |
| Prior Medications, % (n)       |                        |                         |                             |       |
| Beta-Blocker                   | 78.6 (31)              | 64.3 (9)                | 78.6 (22)                   | 0.459 |
| ACE inhibitors/ARB             | 92.9 (39)              | 85.7 (12)               | 96.4 (27)                   | 0.254 |
| Spirolactone                   | 19.0 (8)               | 35.7 (5)                | 10.7 (3)                    | 1     |
| CCB                            | 14.3 (6)               | 21.4 (3)                | 10.7 (3)                    | 0.383 |
| Digoxin                        | 38.1 (16)              | 92.9 (13)               | 10.7 (3)                    | 0.18  |
| Amiodarone                     | 9.5 (4)                | 14.3 (2)                | 7.1 (2)                     | 0.59  |
| Statins                        | 71.4 (30)              | 71.4 (20)               | 71.4 (10)                   | 1     |
| Implantable Device at EPS*     | 85.7 (36)              | 85.7 (12)               | 85.7 (24)                   | 1     |

\*within 14 days

218  
 219 **Key:** Values are n, mean ± standard deviation, or median (interquartile range). Categorical variables are  
 220 compared using Fisher’s exact test; continuous variables using the t-test (except BNP: Mann-Whitney U  
 221 test performed because data is not normally distributed). All patients had electrophysiology study based  
 222 on the presence of ischemic cardiomyopathy, left ventricular ejection fraction ≤ 40% and non-sustained  
 223 VT/VF. ACE, angiotensin converting enzyme; ARB, angiotensin receptor blockers; BNP, B-type natriuretic  
 224 peptide concentration; CCB, calcium channel blockers; CAD, coronary artery disease; EPS,  
 225 electrophysiology study; IVCD, intraventricular conduction delay; LAD, left anterior descending artery;  
 226 LBBB, left bundle branch block; LCx, left circumflex artery; MI, myocardial infarction; RBBB, right bundle  
 227 branch block; RCA, right coronary artery, Revasc., coronary revascularization; Statins, HMG-CoA  
 228 reductase inhibitors.  
 229

230  
231

**Online Table V.**  
**Top 40 Extracted Features for endpoint of VT/VF used in the SVM model**

| Feature | Amplitude | VT/VF                                                       | Description                                                                         | Category         |
|---------|-----------|-------------------------------------------------------------|-------------------------------------------------------------------------------------|------------------|
| 1       | 1.738     | time_reversal_asymmetry_statistic_lag_3                     | Direction reversal, i.e. vectorial change, at 3ms                                   | Time             |
| 2       | 1.440     | spkt_welch_density__coeff_5                                 | Cross power spectral density at 5 frequencies                                       | Frequency        |
| 3       | -1.068    | agg_linear_trend__f_agg_"min"__chunk_len_50__attr_"rvalue"  | Correlation of linear trend across minima of all 50ms chunks                        | Time             |
| 4       | 1.038     | change_quantiles__f_agg_"mean"__isabs_False__qh_0.8__ql_0.4 | Absolute consecutive change between 0.4 and 0.8 of amplitude                        | Time             |
| 5       | 1.007     | variance_larger_than_standard_deviation                     | Is variance larger than SD? (Boolean 1/0)                                           | Time             |
| 6       | -0.956    | last_location_of_minimum                                    | Last time point of minimum value                                                    | Time             |
| 7       | 0.891     | agg_linear_trend__f_agg_"var"__chunk_len_10__attr_"rvalue"  | Correlation of linear trend across variance of all 10ms chunks                      | Time             |
| 8       | 0.848     | number_peaks__n_3                                           | Number of peaks greater than 3 ms                                                   | Time             |
| 9       | 0.803     | fft_coefficient__coeff_48__attr_"abs"                       | Absolute value of Fourier coefficient at 130Hz                                      | Frequency (High) |
| 10      | -0.740    | change_quantiles__f_agg_"mean"__isabs_True__qh_0.8__ql_0.6  | Absolute consecutive change between 0.6 and 0.8 of amplitude                        | Time             |
| 11      | -0.719    | agg_linear_trend__f_agg_"var"__chunk_len_50__attr_"rvalue"  | Correlation of linear trend across variance of all chunks of data of duration 50 ms | Time             |
| 12      | -0.649    | fft_coefficient__coeff_61__attr_"abs"                       | Absolute value of the Fourier coefficient at 165Hz                                  | Frequency (High) |
| 13      | -0.639    | index_mass_quantile__q_0.8                                  | Time point of 0.8 of cumulative mass                                                | Time             |
| 14      | 0.618     | fft_coefficient__coeff_41__attr_"abs"                       | Absolute value of the Fourier coefficient at 111Hz                                  | Frequency (High) |
| 15      | -0.546    | agg_linear_trend__f_agg_"var"__chunk_len_5__attr_"slope"    | Slope of linear trend across variance of all chunks of data of duration 50 ms       | Time             |
| 16      | -0.524    | percentage_of_reoccurring_values_to_all_values              | Percentage of recurring values                                                      | Time             |
| 17      | 0.517     | large_standard_deviation__r_0.1500000000000000002           | Boolean is SD > 0.15 range                                                          | Time             |
| 18      | 0.510     | fft_coefficient__coeff_20__attr_"angle"                     | Angle value of the Fourier coefficient at 54Hz                                      | Frequency (Mid)  |
| 19      | -0.482    | change_quantiles__f_agg_"var"__isabs_False__qh_0.8__ql_0.4  | Variance between 0.4 and 0.8 of magnitude                                           | Time             |
| 20      | 0.425     | fft_coefficient__coeff_98__attr_"imag"                      | Imaginary part of the Fourier coefficient at 264Hz                                  | Frequency (High) |

232  
233  
234  
235  
236

| Feature | Amplitude | VT/VF                                                      | Description                                                        | Category         |
|---------|-----------|------------------------------------------------------------|--------------------------------------------------------------------|------------------|
| 21      | -0.422    | has_duplicate_min                                          | Boolean is minimum repeated                                        | Time             |
| 22      | -0.360    | energy_ratio_by_chunks__num_segments_10__segment_focus_8   | Energy in chunk 8 of 10 vs. entire series                          | Time             |
| 23      | 0.356     | fft_coefficient__coeff_19__attr_"imag"                     | Imaginary part of the Fourier coefficient at 51Hz                  | Frequency (Mid)  |
| 24      | -0.355    | fft_coefficient__coeff_8__attr_"real"                      | Real part of the Fourier coefficient at 265Hz                      | Frequency (High) |
| 25      | 0.347     | approximate_entropy__m_2__r_0.1                            | Approximate entropy across 2ms filtered at 0.1                     | Frequency        |
| 26      | -0.346    | fft_coefficient__coeff_27__attr_"angle"                    | Angle value of the Fourier coefficient at 73Hz                     | Frequency (Mid)  |
| 27      | 0.343     | partial_autocorrelation__lag_2                             | Partial autocorrelation at 2ms                                     | Time             |
| 28      | -0.317    | fft_coefficient__coeff_37__attr_"real"                     | Real part of the Fourier coefficient at 100Hz                      | Frequency (Mid)  |
| 29      | 0.316     | friedrich_coefficients__m_3__r_30__coeff_1                 | Friedrich coefficient 1 of 3-degree polynomial across 30 quantiles | Time             |
| 30      | 0.309     | cwt_coefficients__widths_(2, 5, 10, 20)__coeff_14__w_5     | Continuous wavelet transform for 5ms among 2, 5, 10, and 20ms      | Time             |
| 31      | 0.300     | fft_coefficient__coeff_12__attr_"real"                     | Real part of the Fourier coefficient at 32Hz                       | Frequency (Low)  |
| 32      | 0.300     | fft_coefficient__coeff_43__attr_"angle"                    | Angle value of the Fourier coefficient at 116Hz                    | Frequency (High) |
| 33      | -0.285    | fft_coefficient__coeff_38__attr_"real"                     | Real part of the Fourier coefficient at 103Hz                      | Frequency (High) |
| 34      | -0.276    | large_standard_deviation__r_0.350000000000000003           | Boolean is SD > 0.35 range                                         | Time             |
| 35      | -0.250    | cwt_coefficients__widths_(2, 5, 10, 20)__coeff_3__w_2      | Continuous wavelet transform for 2ms among 2, 5, 10, and 20ms      | Time             |
| 36      | 0.242     | fft_coefficient__coeff_25__attr_"angle"                    | Angle value of the Fourier coefficient at 68Hz                     | Frequency (Mid)  |
| 37      | -0.239    | fft_coefficient__coeff_28__attr_"angle"                    | Angle value of the Fourier coefficient at 76Hz                     | Frequency (Mid)  |
| 38      | -0.236    | change_quantiles__f_agg_"mean"__isabs_True__qh_0.2__ql_0.0 | Absolute consecutive change between 0.0 and 0.2 of amplitude       | Time             |
| 39      | 0.227     | fft_coefficient__coeff_94__attr_"real"                     | Real part of the Fourier coefficient at 254Hz                      | Frequency (High) |
| 40      | -0.218    | fft_coefficient__coeff_29__attr_"angle"                    | Angle value of the Fourier coefficient at 78Hz coefficient         | Frequency (Mid)  |

237 **Key:** Frequency descriptions are subdivided into low bandwidth (<50 Hz), corresponding to  
238 MAP waveform shape and resting potential, high bandwidth (>100 Hz), corresponding to  
239 transients such as Phase 0 and 1, and mid- bandwidth (51-100 Hz).

240  
241

242  
243  
244

**Online Table VI**  
**Top 40 Extracted Features for endpoint of all-cause mortality used in the SVM model**

| Feature | Amplitude | Death                                                      | Description                                                           | Category         |
|---------|-----------|------------------------------------------------------------|-----------------------------------------------------------------------|------------------|
| 1       | -2.876    | approximate_entropy__m_2__r_0.1                            | Approximate entropy across 2ms filtered at 0.1                        | Frequency (Low)  |
| 2       | -1.798    | ratio_beyond_r_sigma__r_2                                  | Ratio of values > 2SD                                                 | Time             |
| 3       | -1.750    | agg_autocorrelation__f_agg_"median"__maxlag_40             | Autocorrelation of medians at lags up to 40ms                         | Time             |
| 4       | 1.152     | time_reversal_asymmetry_statistic__lag_3                   | Direction reversal at 3ms                                             | Time             |
| 5       | -0.963    | spkt_welch_density__coeff_2                                | Cross power spectral density at 2 frequencies                         | Frequency        |
| 6       | -0.700    | agg_linear_trend__f_agg_"var"__chunk_len_50__attr_"rvalue" | Correlation of linear trend across variance of all 50ms chunks        | Time             |
| 7       | -0.669    | change_quantiles__f_agg_"var"__isabs_False__qh_0.4__ql_0.0 | Absolute consecutive variance change between 0.0 and 0.4 of amplitude | Time             |
| 8       | 0.656     | fft_coefficient__coeff_98__attr_"abs"                      | Absolute value of the Fourier coefficient at 265Hz                    | Frequency (High) |
| 9       | 0.655     | large_standard_deviation__r_0.2                            | Boolean is SD > 0.20 range                                            | Time             |
| 10      | -0.640    | ratio_beyond_r_sigma__r_1.5                                | Ratio of values > 1.5SD                                               | Time             |
| 11      | -0.606    | number_peaks__n_3                                          | Number of peaks greater than 3 ms left or right                       | Time             |
| 12      | 0.573     | fft_coefficient__coeff_23__attr_"real"                     | Real part of the 23 Fourier coefficient at 62Hz                       | Frequency (Mid)  |
| 13      | 0.555     | ar_coefficient__k_10__coeff_0                              | Autoregression coefficient max lag = 10                               | Time             |
| 14      | -0.537    | fft_coefficient__coeff_37__attr_"real"                     | Real part of the Fourier coefficient at 100Hz                         | Frequency (High) |
| 15      | -0.488    | agg_linear_trend__f_agg_"var"__chunk_len_5__attr_"rvalue"  | Correlation of linear trend across variance of all 5ms chunks         | Time             |
| 16      | 0.446     | agg_linear_trend__f_agg_"max"__chunk_len_50__attr_"rvalue" | Correlation of linear trend across maximums of all 5ms chunks         | Time             |
| 17      | -0.307    | fft_coefficient__coeff_28__attr_"angle"                    | Angle value of the Fourier coefficient at 76Hz                        | Frequency (Mid)  |
| 18      | -0.287    | energy_ratio_by_chunks__num_segments_10__segment_focus_7   | Energy in chunk 7 of 10 vs. entire series                             | Frequency (Mid)  |
| 19      | -0.286    | agg_linear_trend__f_agg_"min"__chunk_len_50__attr_"slope"  | Slope of linear trend across minimum of all 50ms chunks               | Time             |
| 20      | 0.283     | fft_coefficient__coeff_8__attr_"real"                      | Real part of the Fourier coefficient at 22Hz                          | Frequency (Low)  |

245  
246  
247



| Feature | Amplitude | Death                                                      | Description                                                       | Category         |
|---------|-----------|------------------------------------------------------------|-------------------------------------------------------------------|------------------|
| 21      | 0.277     | fft_coefficient__coeff_46__attr_"angle"                    | Angle value of the Fourier coefficient at 14Hz                    | Frequency (Low)  |
| 22      | 0.249     | fft_coefficient__coeff_2__attr_"imag"                      | Imaginary party of the Fourier coefficient at 5.4Hz               | Frequency (Low)  |
| 23      | -0.236    | binned_entropy__max_bins_10                                | Entropy max in up to 10 bins                                      | Frequency (High) |
| 24      | 0.232     | fft_coefficient__coeff_5__attr_"angle"                     | Angle value of the Fourier coefficient at 13.5Hz                  | Frequency (Low)  |
| 25      | 0.225     | cwt_coefficients__widths_(2, 5, 10, 20)__coeff_13__w_5     | Continuous wavelet transform for 5ms among 2, 5, 10, and 20ms     | Time             |
| 26      | -0.215    | cwt_coefficients__widths_(2, 5, 10, 20)__coeff_10__w_2     | Continuous wavelet transform for 2ms among 2, 5, 10, and 20ms     | Time             |
| 27      | 0.205     | change_quantiles__f_agg_"mean"__isabs_True__qh_1.0__ql_0.8 | Absolute consecutive mean change between 0.8 and 1.0 of amplitude | Time             |
| 28      | -0.205    | fft_coefficient__coeff_78__attr_"abs"                      | Absolute value of the Fourier coefficient at 211Hz                | Frequency (High) |
| 29      | 0.202     | fft_coefficient__coeff_64__attr_"angle"                    | Angle value of the Fourier coefficient at 173Hz                   | Frequency (High) |
| 30      | -0.200    | fft_coefficient__coeff_82__attr_"angle"                    | Angle value of the Fourier coefficient at 222Hz                   | Frequency (High) |
| 31      | 0.197     | longest_strike_above_mean                                  | Length of longest string above mean                               | Time             |
| 32      | -0.193    | large_standard_deviation__r_0.15000000000000002            | Boolean is SD > 0.15 range                                        | Time             |
| 33      | 0.191     | last_location_of_maximum                                   | Last time point of maximum                                        | Time             |
| 34      | -0.191    | sum_of_reoccurring_data_points                             | Sum of all recurring data points                                  | Time             |
| 35      | 0.189     | fft_coefficient__coeff_42__attr_"angle"                    | Angle value of the Fourier coefficient at 114Hz                   | Frequency (High) |
| 36      | 0.174     | fft_coefficient__coeff_79__attr_"real"                     | Real part of the Fourier coefficient at 214Hz                     | Frequency (High) |
| 37      | 0.173     | energy_ratio_by_chunks__num_segments_10__segment_focus_9   | Energy in chunk 9 of 10 vs. entire series                         | Time             |
| 38      | -0.166    | fft_coefficient__coeff_29__attr_"angle"                    | Angle value of the Fourier coefficient at 78Hz                    | Frequency (Mid)  |
| 39      | 0.165     | value_count__value_0                                       | Number of 0 values                                                | Time             |
| 40      | 0.162     | has_duplicate_min                                          | Boolean is minimum duplicated                                     | Time             |

248 **Key:** Frequency descriptions are subdivided into low bandwidth (<50 Hz), corresponding to  
249 MAP waveform shape and resting potential, high bandwidth (>100 Hz), corresponding to  
250 transients such as Phase 0 and 1, and mid- bandwidth (51-100 Hz).  
251

252 **Online Table VII – Confusion matrices for all single-beat MAPs across all 10 test sets**  
 253  
 254

| <b>VT/VF</b>       |                |                            |              | <b>Mortality</b>   |                |                            |              |
|--------------------|----------------|----------------------------|--------------|--------------------|----------------|----------------------------|--------------|
|                    |                | <b>95% Conf. Intervals</b> |              |                    |                | <b>95% Conf. Intervals</b> |              |
|                    | <b>Percent</b> | <b>Lower</b>               | <b>Upper</b> |                    | <b>Percent</b> | <b>Lower</b>               | <b>Upper</b> |
| <b>Sensitivity</b> | 72.65          | 71.49                      | 73.78        | <b>Sensitivity</b> | 59.95          | 58.54                      | 61.35        |
| <b>Specificity</b> | 88.98          | 88.38                      | 89.56        | <b>Specificity</b> | 81.64          | 80.92                      | 82.34        |
| <b>PPV</b>         | 78.24          | 77.12                      | 79.32        | <b>PPV</b>         | 57.03          | 55.64                      | 58.41        |
| <b>NPV</b>         | 85.65          | 84.98                      | 86.29        | <b>NPV</b>         | 83.38          | 82.68                      | 84.05        |
| <b>Accuracy</b>    | 83.22          | 82.64                      | 83.78        | <b>Accuracy</b>    | 75.37          | 74.71                      | 76.03        |

255  
 256

257 **Online Table VIII - Similar Respiratory Rate for MAPs predicting/not predicting each endpoint**  
 258

|                           | <u><b>VT/VF</b></u> | <u><b>No VT/VF</b></u> | <u><b>Mort</b></u> | <u><b>No Mort</b></u> |
|---------------------------|---------------------|------------------------|--------------------|-----------------------|
| <b>Respiratory Rate</b>   | 14.71               | 15.45                  | 15.59              | 14.94                 |
| <b>Standard deviation</b> | 2.87                | 3.00                   | 2.99               | 2.95                  |
| <b>t-test p</b>           | 0.45                |                        | 0.49               |                       |

259  
 260  
 261  
 262  
 263  
 264  
 265

**Online Table IX - Similar recording quality, measured as the peak of autocorrelation for successive beats, for MAPs predicting/not predicting each endpoint**

|                                           | <b>VT/VF</b> | <b>No VT/VF</b> | <b>Mortality</b> | <b>No Mortality</b> |
|-------------------------------------------|--------------|-----------------|------------------|---------------------|
| <b>MAP consistency by autocorrelation</b> | 0.89         | 0.86            | 0.86             | 0.88                |
| <b>Standard deviation</b>                 | 0.09         | 0.08            | 0.09             | 0.09                |
| <b>t-test p</b>                           | 0.41         |                 | 0.57             |                     |

266

267 **Supplemental Figures:**  
268

269 **Online Figure I**

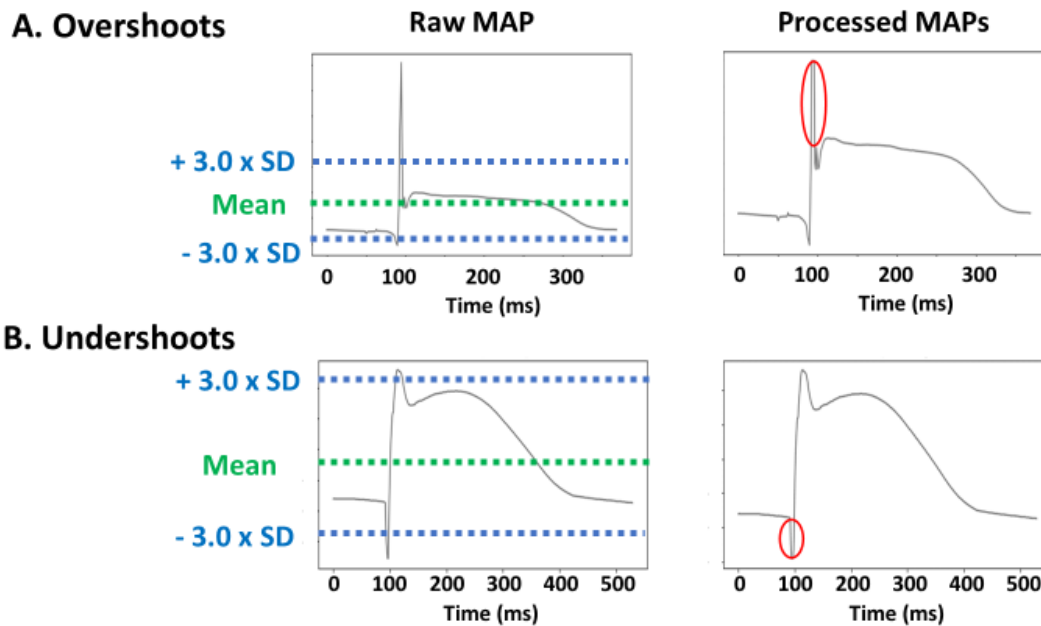

270

271

272 **Online Figure I. Preprocessing Applied to MAPs.** A. Clipping phase 0 overshoot, in an RV MAP

273 from a 67-year-old male with LVEF 25%. Outlier removal eliminated this phase 0 overshoot

274 while maintaining MAP shape. B. Clipping undershoot from a Ventricular MAP in a 59-year-old

275 male with LVEF 10%. The negative undershoot just before phase 0, possibly related to pacing

276 artifact, was attenuated by this uniform approach to outlier removal. Results from the analysis

277 did not change qualitatively if this step was omitted.

278

279 Online Figure II

280

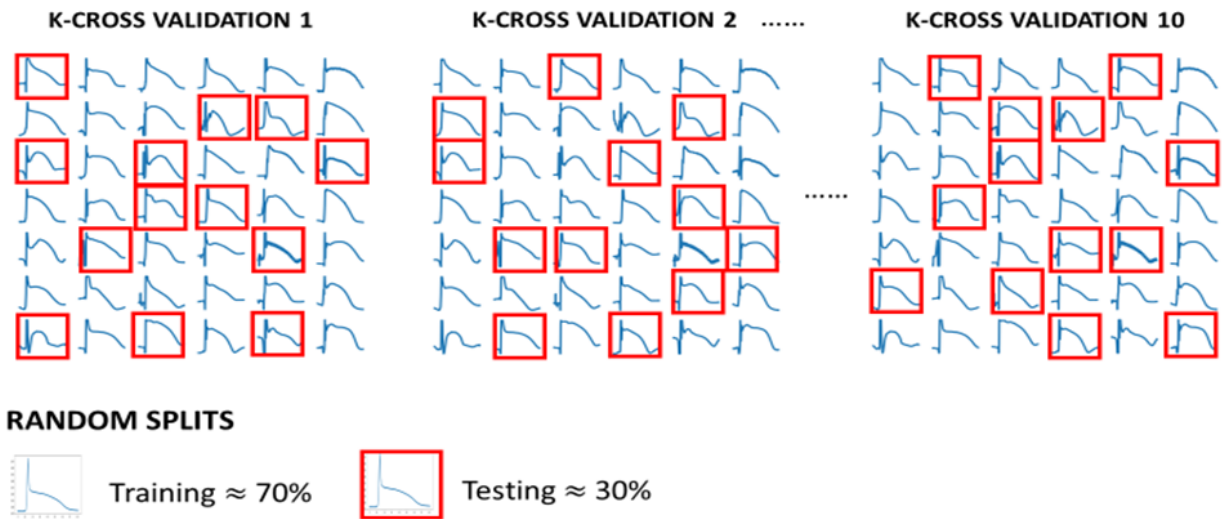

281

282

283 **Online Figure II. K=10 Cross Validations Used in Study.** Each panel shows a single MAP from  
284 each patient (N=42) to represent the set of all recordings from that patient. Data were  
285 randomly allocated into either training (unboxed) or test (red boxes) cohorts, with all beats  
286 from each patient allocated together (stratified Monte Carlo cross-validation). This process was  
287 repeated for 10 cross-validation splits. In each split, approximately 70% of beats were used for  
288 training and 30% were reserved for testing. Training and testing data were distinct for each K-  
289 cross validation split.

290 **Online Figure III**

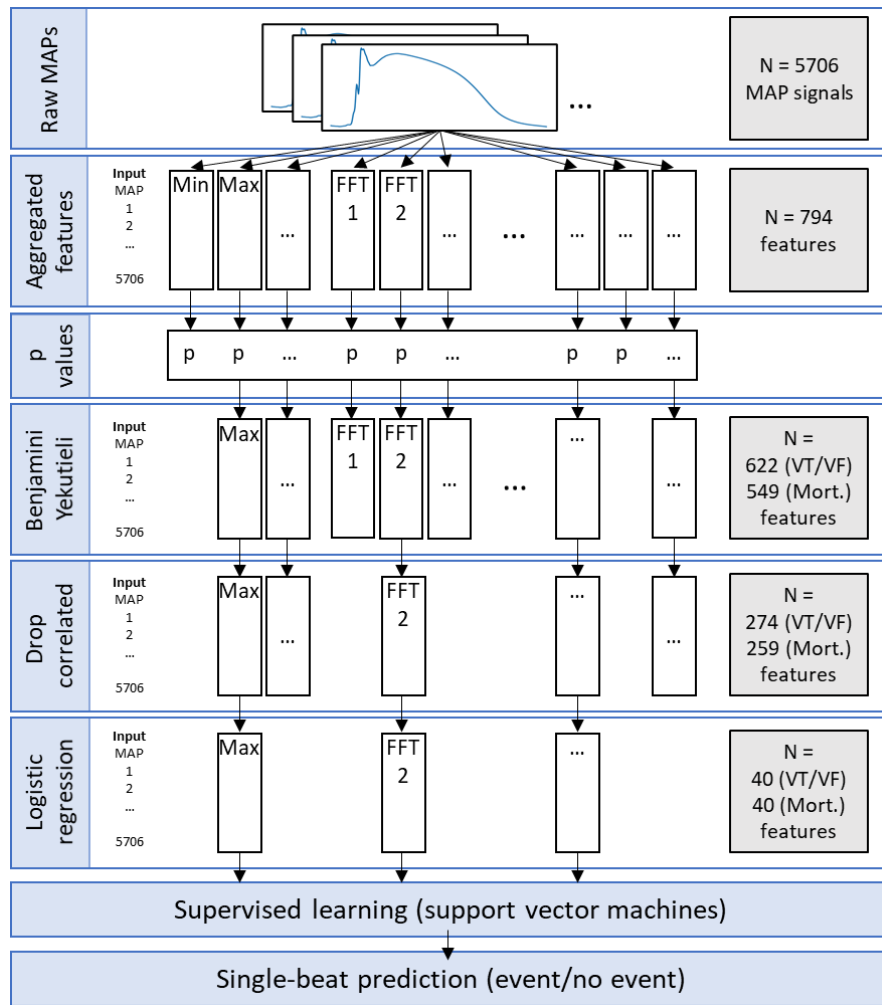

291

292 **Online Figure III. Calculation and selection of features for supervised learning – Raw MAP**

293 signals (N = 5706) are analyzed using the Python tsfresh package to calculate 794 features for

294 each single-beat recording. Each calculated feature is assigned a p value according to the

295 outcome label (VT/VF or mortality) and filtered using the Benjamini Yekutieli procedure

296 (resulting in 622 and 549 features, respectively. When features correlate highly to each other,

297 all but the feature with the highest p-value is removed to result in 274 and 259 features. The

298 top 40 features selected by logistic regression optimized prediction in training and were input

299 to the supervised learning (SVM) model for each endpoint.



301 **Online Figure IV**

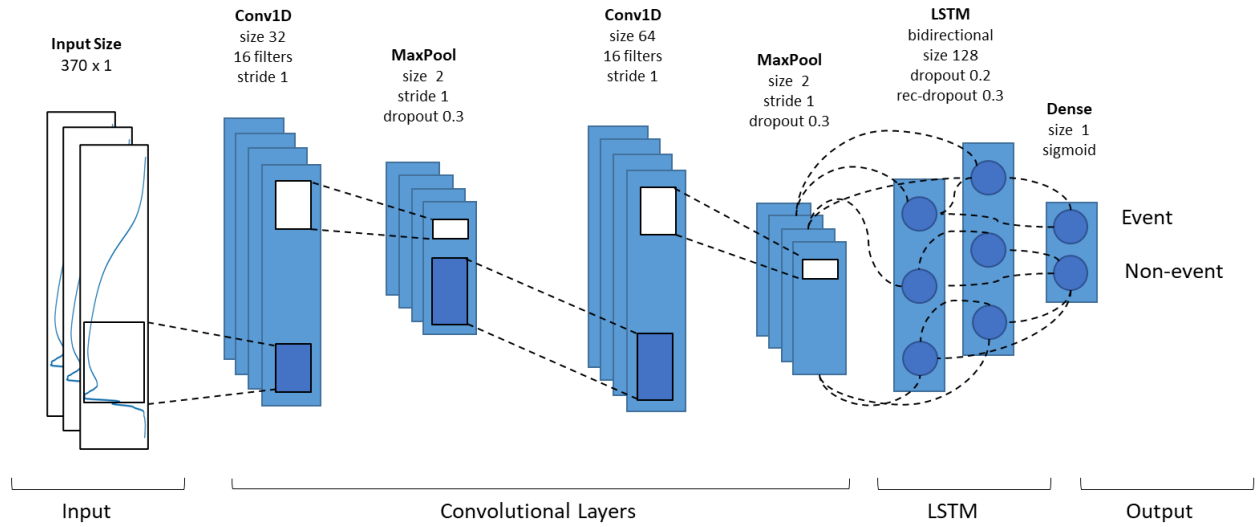

302

303 **Online Figure IV. CNN model architecture** – CNN model, on input size of 370 samples for a  
304 single-beat MAP, with two convolutional layers and a bidirectional long-short term memory  
305 (LSTM) layer that classified events (VT/VF or mortality) vs. non-events (arrhythmia-free or  
306 survival)

307

308 **Glossary of Terms**

309  
310 **Computational phenotyping** - Computational phenotypes are disease phenotypes, identified in  
311 this case from machine learning of clinically measured ventricular action potentials coupled  
312 with computational cell models, which indicate a high or low risk of clinical events (here,  
313 ventricular arrhythmias or death on long-term follow-up).

314  
315 ***tsfresh*** - *tsfresh* is a library of mathematical time-series parameters that efficiently represents  
316 time and frequency-based features for supervised learning. To produce features using *tsfresh*,  
317 the voltage time series data from MAP recordings are passed into the functions of the library  
318 and scalar values are returned for each of 794 features. These are ranked based on p-values for  
319 each output label in turn, and those with least significant features are removed by the  
320 Benjamini-Yekutieli procedure. Resulting features are further filtered as inputs for supervised  
321 learning.<sup>1</sup>

322  
323 **Features** – Features are mathematical descriptions of an input signal or image described by a  
324 value, function, or pattern that can be used as inputs to supervised learning models.

325  
326 **Parameter sets** – Parameter sets are the group of channel conductance values that are used for  
327 a given state of the O’Hara Rudy model simulation. Each parameter set contains 5 values  
328 corresponding to the 5 channels evaluated in this work.

329



330 **L1 regularization, regularization factor, 'liblinear' solver** – L1 regularization, regularization  
331 factor, and the 'liblinear' solver are parameters of the linear regression model used to choose  
332 the top 40 features that correlated with the endpoints.

333

334 **Scikit-learn library** – A python library containing various classification, regression, and  
335 clustering algorithms for data science applications.

336

## 337 ReadMe Document for Source Code and Demo

338

### 339 **1. Background**

340 This document provides readme documentation for the source code used to generate the  
341 results for the manuscript entitled “Machine Learning of in vivo Tissue Electrophysiology in  
342 Patients with Heart Failure “.

343

344 There is also a demo code to show the results of the trained model for a sample dataset.

345

### 346 **2. Files attached**

- 347 • Code: The main code is presented in a Jupyter notebook format (.ipynb). The code  
348 provides information for all the steps and the functions that are used in the result.  
349 Comments are provided for each function.
  - 350 ○ The main code is saved in “Code\_for\_manuscript\_submission.ipynb” as jupyter  
351 notebook in the Code folder. The rest of the functions are helper functions saved  
352 as a .py file. The full source code will only run with full dataset (we only provide  
353 demo dataset).
- 354 • Data: Only a subset of the data is provided for demo purposes and can be found in the  
355 Demo folder.
- 356 • Demo Folder contents:
  - 357 ○ 20191219 is an excel sheet showing the actual labels for both VTVF and  
358 Mortality endpoints and whether they were in training/validation splits in the  
359 trained model
  - 360 ○ Calc\_metrics\_v2: helper function to calculate accuracy, sensitivity, specificity,  
361 NPV, PPV.
  - 362 ○ Demo\_Code.ipynb: Jupyter notebook to run demo. Running this demo will show  
363 results from the sample dataset provided.
  - 364 ○ Mortality\_CV1\_finalized\_model.sav: trained model using cross validation 1 for  
365 mortality endpoint.
  - 366 ○ VTVF\_CV1\_finalized\_model.sav: trained model using cross validation 1 for VTVF  
367 endpoint.
  - 368 ○ Mortality\_labels\_demo & Mortality\_tsfresh\_features\_demo: input and true  
369 output for model (Mortality). First 5-digit contain patient ID, and last 4 digits  
370 contain beat ID.
  - 371 ○ VTVF\_labels\_demo & VTVF\_tsfresh\_features\_demo: input and true output for  
372 model (VTVF).
  - 373 ○ demo\_data\_20191219.npz: numpy (.npz) file that has the voltage-timeseries  
374 MAPs. Each point is 1msec apart and the values are voltages in mV.

375

### 376 **3. Hardware and Software**

377

378 This program runs on a desktop computer system with following specifications:

- 379 • Inter Core i9-9900K CPU @3.6Ghz, 3600 Mhz, \* cores, 16 Logical Processors
- 380 • Microsoft Windows 10 Pro

- 381       • 32 GB RAM

382

383 All computations were performed on Python 3.6 using Anaconda Navigator 1.9.7. The following  
384 packages were used:

- 385       • numpy 1.17.3
- 386       • pandas 0.23.4
- 387       • pandas-datareader 0.8.0
- 388       • scikit-learn 0.21.3
- 389       • scipy 1.3.1
- 390       • tsfresh 0.12.0
- 391       • xlrd 1.2.0
- 392       • xlsxwriter 1.2.6
- 393       • jupyter 1.0.0
- 394       • pickle 1.0 or higher
- 395       • matplotlib 3.3.0

396

#### 397 **4. Time to execute**

398 All runtimes are based on the hardware specifications provided in section 3. Most commands  
399 run in less than 1 minute and a few take up to 3 minutes. The only part that takes a considerable  
400 time (~15 minutes) is “extract\_features\_without\_label” which extracts all the tsfresh features.  
401 This command is performed in the “Code\_for\_manuscript\_submission.ipynb” Jupyter file under  
402 section “Feature extraction using tsfresh” (this requires the full dataset to run. Only code is  
403 provided).

404

#### 405 **5. Instructions to run**

- 406 1. If downloaded as a zipped folder, you will need to unzip the folder.
- 407 2. You will need to install the packages listed in section 3.
- 408 3. Running every cell in the Demo Jupyter file notebook in order will run the program and  
409 produce the results in the Jupyter notebook.
- 410 4. The Demo also allows to plot different MAP beats for the demo files (can be configured).  
411 The runtime for the demo file takes a few minutes or less (tested on machine with  
412 specifications in section 3, but it should run fast on any modern machine as well).

413

#### 414 **6. Software License**

415 Creative Commons Attribution-NonCommercial-NoDerivatives
